# Supplementary material for: A Single Dose of Goji Berries Does Not Affect Postprandial Energy Expenditure and Substrate Oxidation in Healthy, Overweight Men
Source: Hindawi journal article supplement (doi:10.1155/2019/4057143), 2019-02-24
Supplement: f1 [file 4057143.f1.pdf]

# **A single dose of goji berries does not affect postprandial energy expenditure and substrate oxidation in healthy, overweight men**

## **- Supplemental materials -**

José J van den Driessche, Jogchum Plat, Guy Plasqui, Ronald P Mensink

Department of Nutrition and Movement Sciences, NUTRIM School for Nutrition and Translational Research in Metabolism, Maastricht University Medical Center+ (MUMC+), Maastricht, the Netherlands.

Corresponding author:

Ms. José J van den Driessche

Department of Nutrition and Movement Sciences

NUTRIM School for Nutrition and Translational Research in Metabolism

Maastricht University Medical Center+

P.O. Box 616

6200 MD Maastricht, the Netherlands

Email: [j.vandendriessche@maastrichtuniversity.nl](mailto:j.vandendriessche@maastrichtuniversity.nl)

Phone: +31 (0) 43 3881313

## SUPPLEMENTAL TABLES AND FIGURES

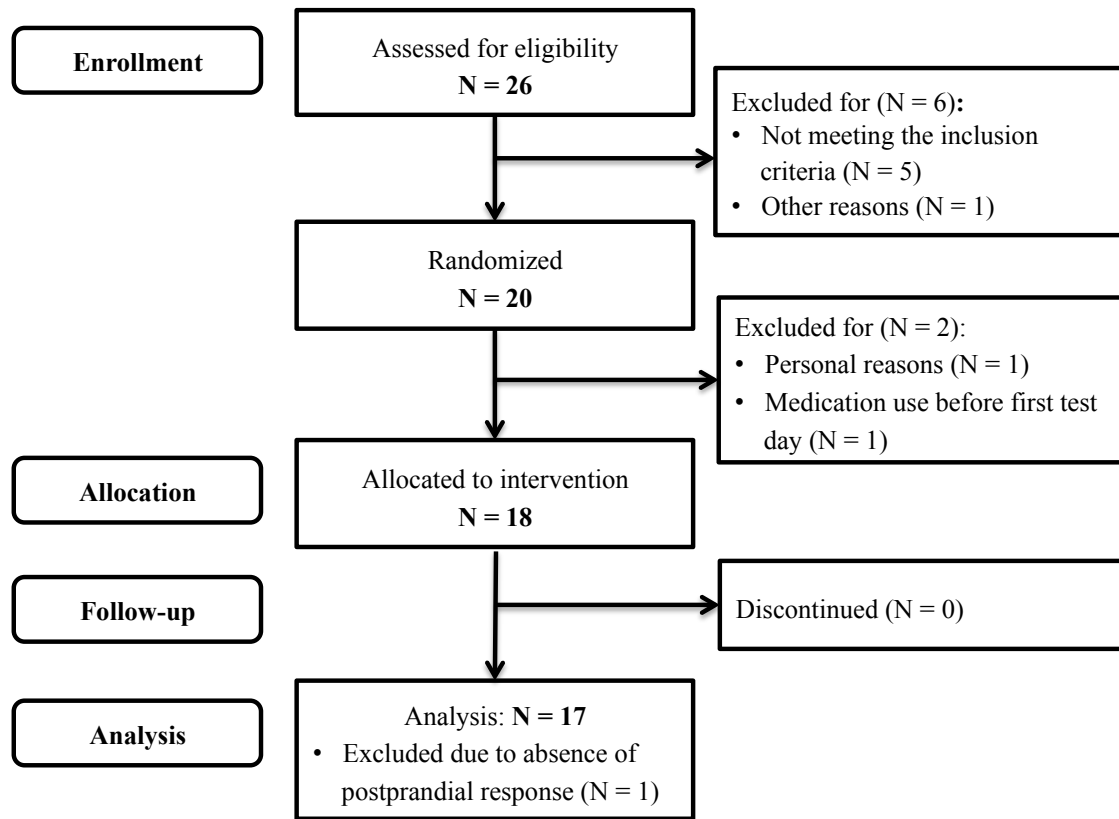

**Supplemental figure 1:** Flow chart of inclusion and exclusion of participants throughout this randomized, crossover study.

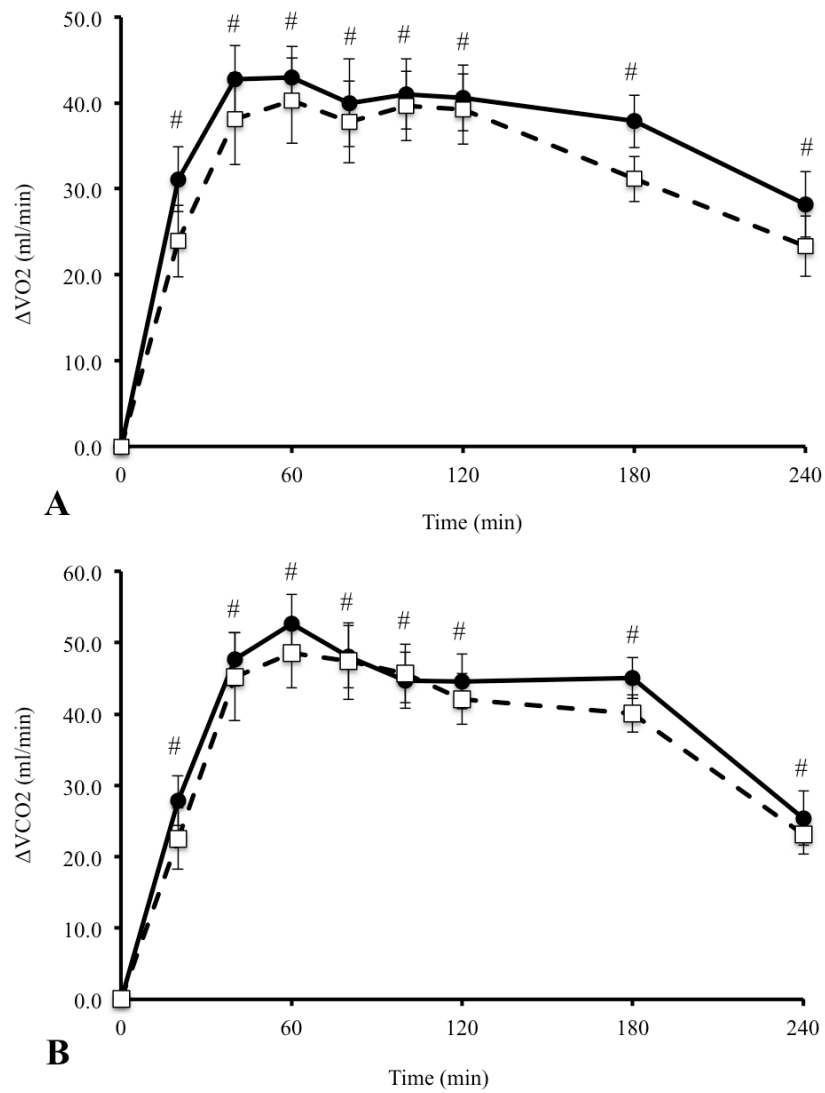

**Supplemental figure 2:** Mean changes ( $\pm$  SEM) in oxygen consumption ( $\text{VO}_2$ ; panel A) and carbon dioxide production ( $\text{VCO}_2$ ; panel B) following the *Lycium barbarum* meal ( $\square$ ) and the control meal ( $\bullet$ ) in 17 healthy overweight men. Data was analyzed using linear mixed models. Significant effects ( $P < 0.001$ , with Bonferroni correction) were found for factor time (#) compared to baseline.

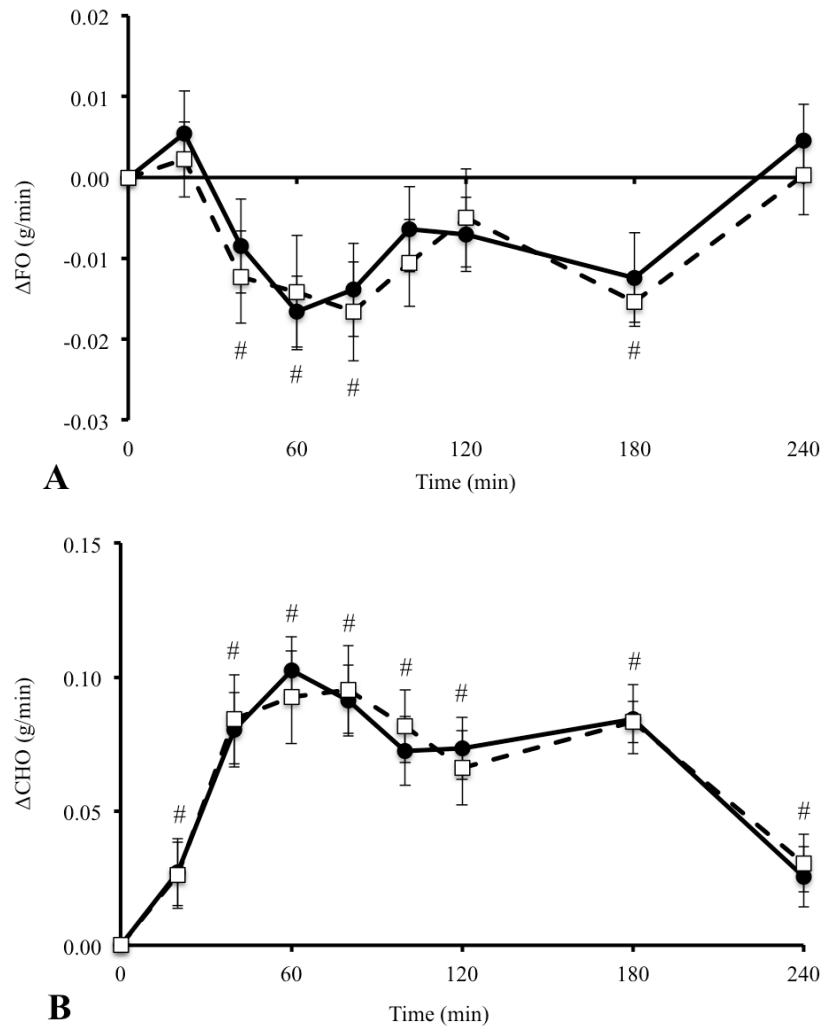

**Supplemental figure 3:** Mean changes ( $\pm$  SEM) in fat oxidation (FO; panel A) and carbohydrate oxidation (CHO; panel B) following the *Lycium barbarum* meal ( $\square$ ) and the control meal ( $\bullet$ ) in 17 healthy overweight men. Data was analyzed using linear mixed models. Significant effects ( $P < 0.001$ , with Bonferroni correction) were found for factor time (#) compared to baseline.

**Supplemental table 1:** habitual dietary intake of the men who participated in the trial as determined by a validated food frequency questionnaire.<sup>1</sup>

|                          |                    |
|--------------------------|--------------------|
| Energy (kcal/day)        | 2544 (1773 – 4425) |
| Fat (energy %)           | 35.6 (26.7 – 41.1) |
| SFA                      | 12.5 (8.7 – 14.0)  |
| MUFA                     | 12.2 (8.2 – 16.9)  |
| PUFA                     | 7.3 (4.9 – 10.4)   |
| Protein (energy %)       | 16.2 (11.9 – 19.7) |
| Carbohydrates (energy %) | 43.8 (28.1 – 50.1) |
| Alcohol (energy %)       | 3.2 (0.0 – 12.7)   |
| Fiber (g/day)            | 31.4 (20.1 – 72.3) |
| Cholesterol (mg/day)     | 270 (123 – 435)    |

<sup>1</sup> Data is presented as medians with ranges

**Supplemental table 2:** iAUC/dAUC over 4 hours for, energy expenditure (EE), respiratory quotient (RQ), and concentrations of plasma glucose, serum free fatty acids (FFA) and serum triacylglycerol (TAG) after *Lycium barbarum* and control meal intake<sup>1</sup>

|         |                                    |      | <i>Lycium barbarum</i> meal | Control meal       |
|---------|------------------------------------|------|-----------------------------|--------------------|
| EE      | kJ per 240 min                     | iAUC | 167 (90 – 269)              | 176 (126 – 298)    |
| RQ      | per 240 min                        | iAUC | 10.6 (0.0 – 18.9)           | 8.9 (1.5 – 21.8)   |
| Glucose | mmol /L per 240 min                | iAUC | 58.4 (6.1 – 225.4)          | 64.0 (3.5 – 290.3) |
| FFA     | mol*10 <sup>3</sup> /L per 240 min | dAUC | 26.9 (0.9 – 57.8)           | 16.8 (3.2 – 43.9)  |
| TAG     | mmol /L per 240 min                | iAUC | 108 (25 – 202)              | 101 (29 – 251)     |

<sup>1</sup> Data is presented as medians with ranges.
